# Supplementary material for: Metal–organic frameworks based on the [1,1′:3′,1′′-terphenyl]-3,3′′,5,5′′-tetracarboxylic acid ligand: syntheses, structures and magnetic properties
Source: Royal Society of Chemistry journal article supplement (doi:10.1039/c4dt02342k), 2014-01-01
Supplement: c4dt02342k1.pdf [file c4dt02342k1.pdf]

*Supporting Information for the Manuscript:*

**Metal-organic frameworks based on [1,1':3',1''-Terphenyl]-  
3,3'',5,5''-tetracarboxylic acid ligand: syntheses, structures and  
magnetic properties**

**Xiaofeng Lv, Lu Liu, Chao Huang, Li'an Guo, Jie Wu\*, Hongwei Hou\*, Yaoting Fan**

The College of Chemistry and Molecular Engineering, Zhengzhou University, Zhengzhou  
450052, P. R. China

Author for correspondence: Prof. Hongwei Hou, E-mail: [houhongw@zzu.edu.cn](mailto:houhongw@zzu.edu.cn)

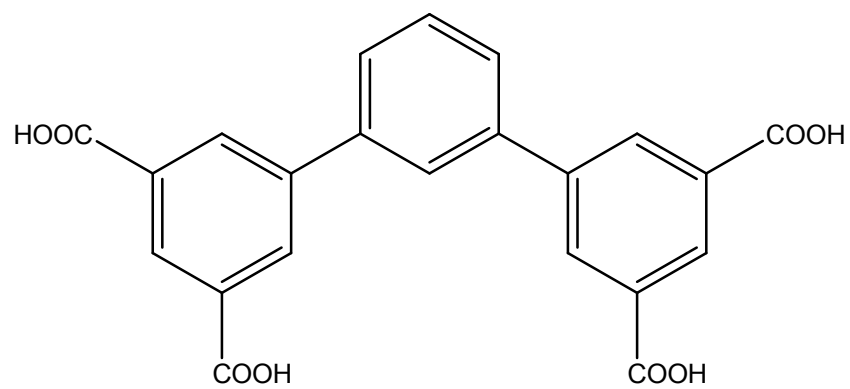

**Scheme S1.** Schematic Molecular Structure of H<sub>4</sub>TPTA.

**Table S1. The Crystal data and structure refinement parameters for polymers 1–5**

| Parameter                                 | 1                                                  | 2                                                  | 3                                                                                | 4                                                                | 5                                                                |
|-------------------------------------------|----------------------------------------------------|----------------------------------------------------|----------------------------------------------------------------------------------|------------------------------------------------------------------|------------------------------------------------------------------|
| Empirical formula                         | C <sub>16</sub> H <sub>13</sub> NO <sub>6</sub> Co | C <sub>16</sub> H <sub>13</sub> NO <sub>6</sub> Ni | C <sub>32</sub> H <sub>23</sub> N <sub>2</sub> O <sub>10.5</sub> Mn <sub>2</sub> | C <sub>34</sub> H <sub>20</sub> N <sub>2</sub> O <sub>8</sub> Mn | C <sub>34</sub> H <sub>20</sub> N <sub>2</sub> O <sub>8</sub> Co |
| Formula weight                            | 374.20                                             | 373.98                                             | 713.40                                                                           | 639.46                                                           | 643.45                                                           |
| Temp (K)                                  | 293(2)                                             | 293(2)                                             | 293(2)                                                                           | 293(2)                                                           | 293(2)                                                           |
| $\lambda/\text{\AA}$                      | 0.71073                                            | 0.71073                                            | 0.71073                                                                          | 0.71073                                                          | 0.71073                                                          |
| Crystal system                            | Monoclinic                                         | Monoclinic                                         | Triclinic                                                                        | Monoclinic                                                       | Monoclinic                                                       |
| Space group                               | C2/c                                               | C2/c                                               | P-1                                                                              | C2/c                                                             | C2/c                                                             |
| a (Å)                                     | 18.905(4)                                          | 18.937(4)                                          | 9.7207(19)                                                                       | 28.507(6)                                                        | 28.427(6)                                                        |
| b (Å)                                     | 11.646(2)                                          | 11.546(2)                                          | 10.111(2)                                                                        | 10.687(2)                                                        | 10.685(2)                                                        |
| c (Å)                                     | 15.432(3)                                          | 15.385(3)                                          | 15.286(3)                                                                        | 18.199(4)                                                        | 17.978(4)                                                        |
| $\alpha$ (°)                              | 90                                                 | 90                                                 | 92.87(3)                                                                         | 90                                                               | 90                                                               |
| $\beta$ (°)                               | 110.81(3)                                          | 111.08(3)                                          | 98.72(3)                                                                         | 97.48(3)                                                         | 97.49(3)                                                         |
| $\gamma$ (°)                              | 90                                                 | 90                                                 | 96.33(3)                                                                         | 90                                                               | 90                                                               |
| V (Å <sup>3</sup> )                       | 3176(1)                                            | 3138(1)                                            | 1472(5)                                                                          | 5497(2)                                                          | 5414(1)                                                          |
| Z                                         | 8                                                  | 8                                                  | 2                                                                                | 8                                                                | 8                                                                |
| $D_{\text{calcd.}}$ (g·cm <sup>-3</sup> ) | 1.565                                              | 1.583                                              | 1.609                                                                            | 1.545                                                            | 1.579                                                            |
| $\mu$ (mm <sup>-1</sup> )                 | 1.113                                              | 1.268                                              | 0.924                                                                            | 0.542                                                            | 0.696                                                            |
| $F(000)$                                  | 1528                                               | 1536                                               | 726                                                                              | 2616                                                             | 2632                                                             |
| $\theta$ range (°)                        | 2.09~25.49                                         | 2.11~25.50                                         | 2.13~25.50                                                                       | 2.26 ~ 25.50                                                     | 2.04~25.50                                                       |
| GOF                                       | 0.996                                              | 1.004                                              | 1.021                                                                            | 1.040                                                            | 1.033                                                            |
| Final R indices [I > 2 $\sigma$ (I)]      | $R_1=0.0657$<br>$wR_2=0.1363$                      | $R_1=0.0468$<br>$wR_2=0.1152$                      | $R_1=0.0524$<br>$wR_2=0.1179$                                                    | $R_1=0.0538$<br>$wR_2=0.1061$                                    | $R_1=0.0381$<br>$wR_2=0.0884$                                    |

<sup>a</sup> $R_1 = \sum ||F_o| - |F_c|| / \sum |F_o|$ ,  $wR_2 = [\sum w(F_o^2 - F_c^2)^2] / \sum w(F_o^2)^2]^{1/2}$ .

**Table S2** Selected Bond Lengths (Å) and Bond Angles (°) for compound **1–5**

| Compound 1                                                                                                             |            |                     |            |                      |            |
|------------------------------------------------------------------------------------------------------------------------|------------|---------------------|------------|----------------------|------------|
| Co(1)-O(1)                                                                                                             | 2.025(3)   | Co(1)-O(4)#1        | 2.077(3)   | Co(1)-O(5)           | 2.152(4)   |
| Co(1)-N(1)                                                                                                             | 2.082(4)   | Co(1)-O(6)          | 2.146(4)   | Co(1)-O(3)#1         | 2.232(3)   |
| O(1)-Co(1)-O(4)#1                                                                                                      | 95.50(13)  | O(1)-Co(1)-N(1)     | 97.55(15)  | N(1)-Co(1)-O(5)      | 85.61(16)  |
| O(5)-Co(1)-O(3)#1                                                                                                      | 88.51(14)  | O(1)-Co(1)-O(6)     | 91.75(13)  | N(1)-Co(1)-O(3)#1    | 105.80(14) |
| O(4)#1-Co(1)-O(6)                                                                                                      | 92.96(15)  | N(1)-Co(1)-O(6)     | 89.72(15)  | O(4)#1-Co(1)-O(3)#1  | 60.99(12)  |
| O(1)-Co(1)-O(5)                                                                                                        | 89.44(14)  | O(4)#1-Co(1)-O(5)   | 91.46(15)  | O(6)-Co(1)-O(3)#1    | 92.22(13)  |
| <sup>a</sup> Symmetry codes: #1 x,-y+1,z-1/2; #2 x,-y+1,z+1/2; #3 -x+1,y,-z+3/2.                                       |            |                     |            |                      |            |
| Compound 2                                                                                                             |            |                     |            |                      |            |
| Ni(1)-O(1)                                                                                                             | 2.010(2)   | Ni(1)-N(1)          | 2.033(3)   | Ni(1)-O(5)           | 2.114(3)   |
| Ni(1)-O(4)#1                                                                                                           | 2.051(3)   | Ni(1)-O(6)          | 2.087(3)   | Ni(1)-O(3)#1         | 2.178(3)   |
| O(1)-Ni(1)-O(4)#1                                                                                                      | 94.58(11)  | O(1)-Ni(1)-O(6)     | 93.22(11)  | O(4)#1-Ni(1)-O(3)#1  | 62.19(10)  |
| N(1)-Ni(1)-O(6)                                                                                                        | 90.91(13)  | O(1)-Ni(1)-O(5)     | 87.64(12)  | O(5)-Ni(1)-O(3)#1    | 89.26(12)  |
| O(4)#1-Ni(1)-O(6)                                                                                                      | 91.42(12)  | N(1)-Ni(1)-O(5)     | 86.24(13)  | O(6)-Ni(1)-O(3)#1    | 91.04(11)  |
| O(4)#1-Ni(1)-O(5)                                                                                                      | 91.27(12)  | N(1)-Ni(1)-O(3)#1   | 106.00(12) |                      |            |
| <sup>a</sup> Symmetry codes: #1 x, -y+1, z-1/2; #2 x, -y+1, z+1/2; #3 -x+1, y, -z+1/2; #4 -x, -y+2, -z-1.              |            |                     |            |                      |            |
| Compound 3                                                                                                             |            |                     |            |                      |            |
| Mn(1)-O(5)#1                                                                                                           | 2.116(3)   | Mn(1)-O(4)#2        | 2.125(3)   | Mn(2)-N(2)           | 2.231(3)   |
| Mn(1)-O(9)                                                                                                             | 2.193(3)   | Mn(1)-O(2)          | 2.193(3)   | Mn(2)-O(6)#5         | 2.284(3)   |
| Mn(1)-O(8)#3                                                                                                           | 2.200(3)   | Mn(1)-O(1)          | 2.274(3)   | Mn(2)-O(8)#4         | 2.260(3)   |
| Mn(2)-O(3)                                                                                                             | 2.091(3)   | Mn(2)-N(1)          | 2.232(3)   | Mn(2)-O(5)#5         | 2.397(3)   |
| N(1)-Mn(2)-O(8)#4                                                                                                      | 158.26(10) | O(5)#1-Mn(1)-O(4)#2 | 116.95(11) | O(5)#1-Mn(1)-O(2)    | 93.58(11)  |
| O(4)#2-Mn(1)-O(2)                                                                                                      | 149.33(11) | O(5)#1-Mn(1)-O(1)   | 151.59(11) | O(3)-Mn(2)-O(5)#5    | 91.18(11)  |
| O(4)#2-Mn(1)-O(1)                                                                                                      | 91.34(10)  | O(2)-Mn(1)-O(1)     | 58.38(10)  | Mn(1)#1-O(5)-Mn(2)#5 | 92.90(10)  |
| O(3)-Mn(2)-N(1)                                                                                                        | 93.19(11)  | O(3)-Mn(2)-N(2)     | 154.23(11) | N(1)-Mn(2)-O(5)#5    | 132.61(10) |
| <sup>a</sup> Symmetry codes: #1 -x, -y, -z+2; #2 x, y-1, z; #3 -x+1, -y, -z+2; #4 -x+1, -y+1, -z+2; #5 -x, -y+1, -z+2. |            |                     |            |                      |            |
| Compound 4                                                                                                             |            |                     |            |                      |            |
| Mn(1)-O(3)#1                                                                                                           | 2.109(2)   | Mn(1)-O(4)#2        | 2.156(2)   | Mn(1)-N(1)           | 2.267(3)   |
| Mn(1)-O(2)                                                                                                             | 2.185(2)   | Mn(1)-N(2)          | 2.245(2)   | Mn(1)-O(1)           | 2.363(2)   |
| O(3)#1-Mn(1)-O(2)                                                                                                      | 96.21 (8)  | O(3)#1-Mn(1)-N(1)   | 120.06(9)  | O(3)#1-Mn(1)-N(2)    | 82.04(9)   |
| O(2)-Mn(1)-N(1)                                                                                                        | 138.89(8)  | O(2)-Mn(1)-O(1)     | 57.15(7)   | O(4)#2-Mn(1)-N(2)    | 172.10(9)  |
| O(3)#1-Mn(1)-O(4)#2                                                                                                    | 98.56(9)   | O(4)#2-Mn(1)-O(2)   | 93.23(8)   |                      |            |
| <sup>a</sup> Symmetry codes: #1 -x, -y+1, -z; #2 x, -y+1, z-1/2; #3 x, -y+1, z+1/2.                                    |            |                     |            |                      |            |
| Compound 5                                                                                                             |            |                     |            |                      |            |
| Co(1)-O(2)#1                                                                                                           | 2.0279(15) | Co(1)-O(1)          | 2.0909(14) | Co(1)-N(2)           | 2.1283(18) |
| Co(1)-O(3)#2                                                                                                           | 2.1249(15) | Co(1)-N(1)          | 2.1276(17) | Co(1)-O(4)#2         | 2.2921(17) |
| O(2)#1-Co(1)-O(1)                                                                                                      | 95.61(6)   | O(2)#1-Co(1)-O(3)#2 | 93.97(6)   | O(1)-Co(1)-O(4)#2    | 92.(6)     |
| O(1)-Co(1)-O(3)#2                                                                                                      | 92.63(6)   | O(2)#1-Co(1)-N(1)   | 83.08(7)   | N(1)-Co(1)-O(4)#2    | 90.75(6)   |
| N(1)-Co(1)-N(2)                                                                                                        | 77.81(7)   | O(3)#2-Co(1)-N(1)   | 92.85(7)   | O(3)#2-Co(1)-O(4)#2  | 58.86(6)   |
| O(2)#1-Co(1)-N(2)                                                                                                      | 121.05(7)  | O(1)-Co(1)-N(2)     | 98.39(7)   | N(2)-Co(1)-O(4)#2    | 83.88(6)   |
| <sup>a</sup> Symmetry codes : #1 -x+1, y, -z+1/2; #2 x,-y+1,z-1/2; #3 x, -y+1, z+1/2.                                  |            |                     |            |                      |            |

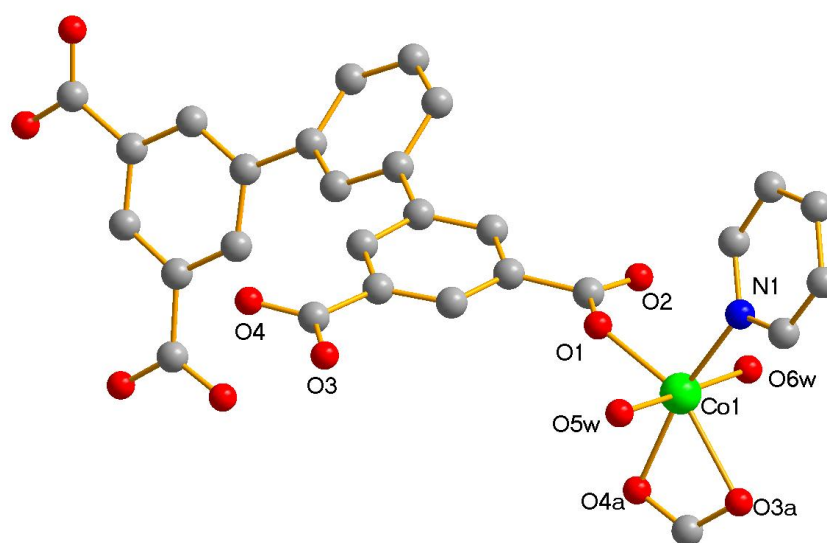

**Fig. S1**, The ball-and-stick drawing of the asymmetric unit in **1**, the hydrogen atoms and solvent molecules are omitted. Symmetry codes: a:  $x, 1-y, -1/2+z$ ;

**XRD Patterns.** To confirm the phase purity of these polymers, the PXRD patterns were recorded for complexes 1–5, and they were comparable to the corresponding simulated ones calculated from the single-crystal diffraction data (Figure. S7, Supporting Information), indicating a pure phase of each bulky sample.

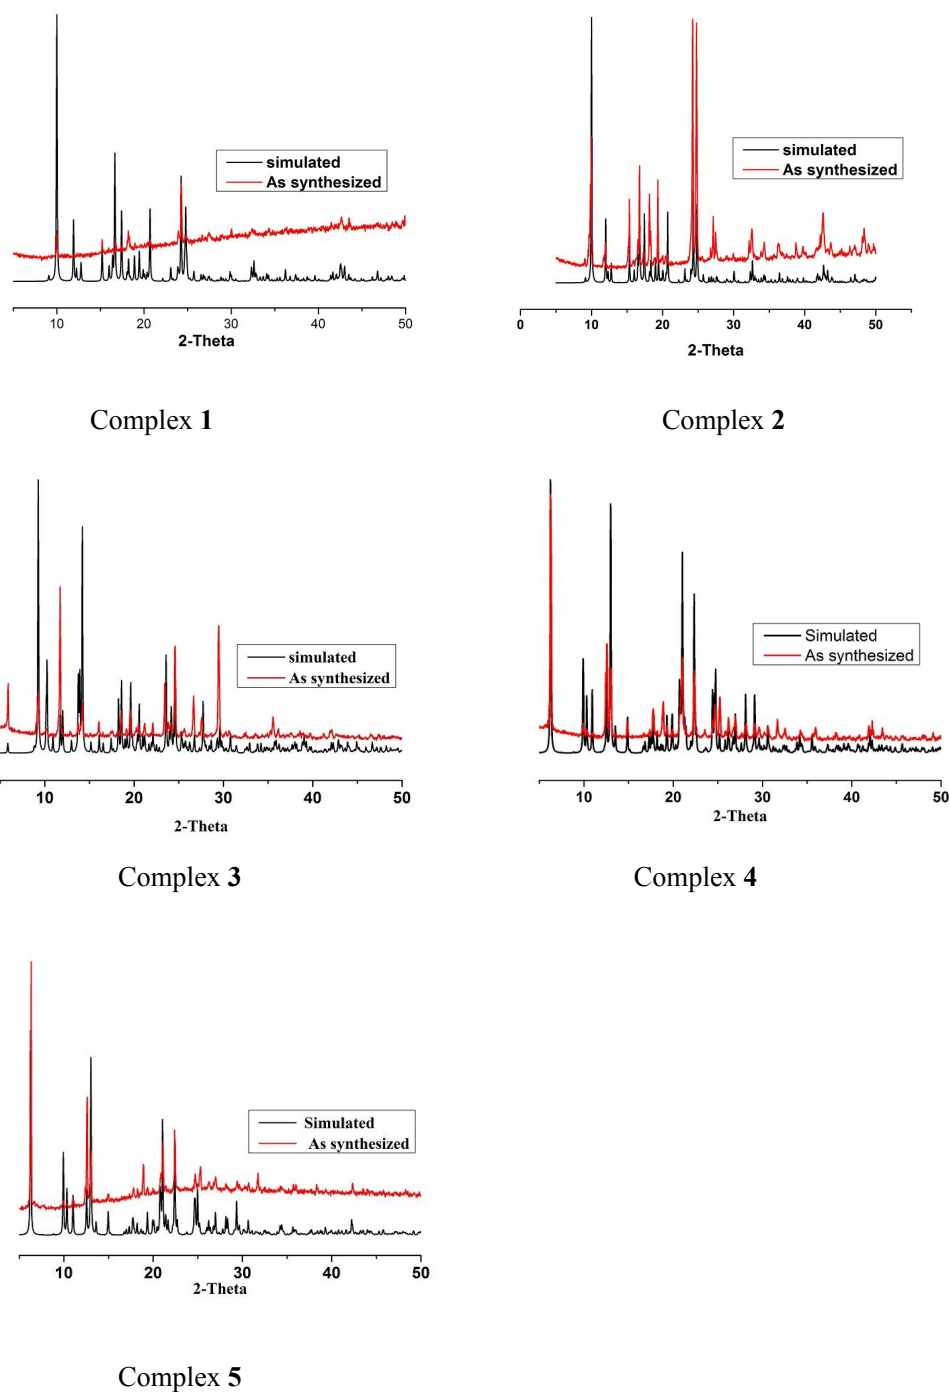

**Fig. S2.** Experimental (red) and simulated (black) PXRD patterns of 1–5.
